# Supplementary material
Source: publisher site journal article supplement (https://www.dovepress.com/article/602062)
Supplement: Supplementary file 1 [file 602062%20Supplementary%20Materials.docx]

**

Figure S1.** Night-to-night variability in sleep latency periods across participants.

**Note:** Each colored line corresponds to an individual participant for (A) N1 latency, (B) N2 latency, (C) N3 latency, and (D) REM latency. The 50 colored traces in each panel represent the inter-night variability in individual sleep latency across the cohort. Considerable variability is evident across all sleep stages, with the most pronounced fluctuations observed during the N1 latency period.





**Figure S2.** Night-to-night variability in sleep stage percentages across participants.

**Note:** Each colored line corresponds to an individual participant for (A) N1%, (B) N2%, (C) N3%, and (D) REM%. The traces depict inter-individual and nightly variability in each sleep stage. Compared with the relatively stable N1% and N2%, greater variability is observed in N3% and REM%, with REM% showing the most pronounced fluctuations.





**Figure S3.** Night-to-night variability in macrostructural sleep measures across participants.

**Note:** Each colored line corresponds to an individual participant for (A) total sleep time (TST), (B) sleep onset latency (SOL), (C) sleep efficiency (SE), and (D) wake after sleep onset (WASO). The traces illustrate nightly fluctuations in each measure. Compared with the relatively stable TST and SE, greater variability is observed in SOL and WASO, with SOL exhibiting the most pronounced changes.





**Figure S4.** Night-to-night variability in microstructural sleep measures across participants.

**Note:** Each colored line corresponds to an individual participant for (A) REM density, (B) sleep stage transition index, (C) wakefulness index, and (D) cortical arousal index. The traces illustrate nightly fluctuations in sleep architecture and arousal-related measures. Compared with SSTI and CAI, REM density and wakefulness index showed greater night-to-night fluctuations.

**Table S1.** Final multilevel model specifications

| Outcome | Within-individual predictor | Between-individual predictor | Interaction | Random effect |
| --- | --- | --- | --- | --- |
| dTST | TST_c | vTST, vSSTI | None | Participant ID |
| dSE | SE_c | vTST | None | Participant ID |
| dWASO | WASO_c | vN2%, vSSTI | WASO_c × vN2% | Participant ID |
| dSOL | SOL_c | None | None | Participant ID |

**Note:** dTST, objective–subjective total sleep time discrepancy; dSE, objective–subjective sleep efficiency discrepancy; dWASO, objective–subjective wake after sleep onset discrepancy; dSOL, objective–subjective sleep onset latency discrepancy. TST_c, SE_c, WASO_c, and SOL_c indicate person-mean centered objective sleep parameters. vTST, vSSTI, and vN2% indicate between-individual variability in total sleep time, sleep stage transition index, and N2 sleep percentage, respectively. Participant ID was included as a random intercept in all models.

**Table S****2.** Model comparison results for dTST

| Model | k | AIC | BIC | logLik | Delta_AIC | Weight |
| --- | --- | --- | --- | --- | --- | --- |
| Level-2 model | 6 | 3665.2 | 3687.7 | −1826.62 | 0.0 | 0.989 |
| Interaction(vSSTI) | 6 | 3675.2 | 3697.7 | −1831.61 | 10.0 | 0.007 |
| Interaction (vTST) | 6 | 3676.3 | 3698.7 | −1832.13 | 11.0 | 0.004 |
| Level-1 model | 4 | 3693.2 | 3708.2 | −1842.62 | 28.0 | 0.000 |
| Null model | 3 | 3834.8 | 3846.0 | −1914.39 | 169.5 | 0.000 |

**Note:** The Level-2 model including centered TST, TST variability, and SSTI variability showed the best fit based on AIC. TST variability showed a marginal association in the final model, whereas SSTI variability was retained based on model fit but was not interpreted as a primary finding.

**Table S3.** Model comparison results for dSE

| Model | k | AIC | BIC | logLik | Delta_AIC | Weight |
| --- | --- | --- | --- | --- | --- | --- |
| Level-2 model | 5 | 2617.1 | 2635.8 | –1303.55 | 0.0 | 0.727 |
| Interaction model | 6 | 2619.1 | 2641.5 | –1303.53 | 2.0 | 0.271 |
| Level-1 model | 4 | 2629.3 | 2644.3 | –1310.66 | 12.2 | 0.002 |
| Null model | 3 | 2790.3 | 2801.5 | –1392.14 | 173.2 | 0.000 |

**Note:** The Level-2 model including centered SE and TST variability showed the best fit based on AIC. Centered SE showed a robust association with dSE, while TST variability showed a significant negative association.

**Table S4.** Model comparison results for dWASO

| Model | k | AIC | BIC | logLik | Delta_AIC | Weight |
| --- | --- | --- | --- | --- | --- | --- |
| Comprehensive model | 6 | 3157.1 | 3179.6 | –1572.57 | 0.0 | 0.952 |
| Interaction model | 6 | 3163.5 | 3186.0 | –1575.75 | 6.4 | 0.040 |
| Univariate model (N2% variability) | 5 | 3168.6 | 3187.4 | –1579.32 | 11.5 | 0.003 |
| Univariate model (vSSTI) | 5 | 3170.6 | 3189.3 | –1580.32 | 13.5 | 0.001 |
| Univariate model (vTST) | 5 | 3171.0 | 3189.7 | –1580.50 | 13.9 | 0.001 |
| Univariate model (REM% variability) | 5 | 3172.7 | 3191.4 | –1581.35 | 15.6 | 0.000 |
| Univariate model (vRD) | 5 | 3178.1 | 3196.8 | –1584.06 | 21.0 | 0.000 |
| Univariate model (N3% variability) | 5 | 3179.1 | 3197.8 | –1584.56 | 22.0 | 0.000 |
| Level-1 model | 4 | 3188.8 | 3203.7 | –1590.38 | 31.6 | 0.000 |

**Note:** The comprehensive model including centered WASO, N2% variability, SSTI variability, and the centered WASO × N2% variability interaction showed the best fit based on AIC. Centered WASO, N2% variability, and the interaction term were significant predictors, whereas SSTI variability was retained in the model but was not significant.

**Table S5.** Model comparison results for dSOL

| Model | k | AIC | BIC | logLik | Delta_AIC | Weight |
| --- | --- | --- | --- | --- | --- | --- |
| Level-1 model | 4 | 3110.5 | 3125.4 | –1551.23 | 0.0 | 1.000 |
| Null model | 3 | 3216.4 | 3227.6 | –1605.19 | 105.9 | 0.000 |

**Note:** The Level-1 model containing centered SOL showed the best fit based on AIC, with an AIC weight of 1.000.

**Table S6.** Sensitivity analyses using SD- and log-SD-based variability metrics

SD- and log-SD-based variability metrics were used as alternatives to the primary CV-based variability predictors. Only predictors included in the corresponding final CV-based models are shown; the dSOL model is not shown because no variability predictor was retained in the final model.

| Outcome | Alternative metric | Predictor | Estimate (β) | SE | t-value | p-value |
| --- | --- | --- | --- | --- | --- | --- |
| dTST | SD | Centered TST | 0.798 | 0.057 | 14.04 | <0.001 |
| dTST | SD | TST variability (SD) | −0.969 | 0.428 | −2.26 | 0.028 |
| dTST | SD | SSTI variability (SD) | −6.418 | 6.665 | −0.96 | 0.340 |
| dTST | log-SD | Centered TST | 0.798 | 0.057 | 14.04 | <0.001 |
| dTST | log-SD | TST variability (log-SD) | −114.203 | 65.902 | −1.73 | 0.090 |
| dTST | log-SD | SSTI variability (log-SD) | −69.864 | 127.769 | −0.55 | 0.587 |
| dSE | SD | Centered SE | 0.887 | 0.058 | 15.23 | <0.001 |
| dSE | SD | TST variability (SD) | −0.153 | 0.074 | −2.07 | 0.044 |
| dSE | log-SD | Centered SE | 0.887 | 0.058 | 15.23 | <0.001 |
| dSE | log-SD | TST variability (log-SD) | −21.290 | 8.979 | −2.37 | 0.022 |
| dWASO | SD | Centered WASO | 0.970 | 0.023 | 41.53 | <0.001 |
| dWASO | SD | N2% variability (SD, centered) | 2.974 | 2.040 | 1.46 | 0.152 |
| dWASO | SD | SSTI variability (SD) | 8.240 | 4.438 | 1.86 | 0.070 |
| dWASO | SD | Centered WASO × N2% variability (SD) | 0.011 | 0.005 | 2.19 | 0.030 |
| dWASO | log-SD | Centered WASO | 0.969 | 0.023 | 42.97 | <0.001 |
| dWASO | log-SD | N2% variability (log-SD, centered) | 91.168 | 31.714 | 2.87 | 0.006 |
| dWASO | log-SD | SSTI variability (log-SD) | 195.986 | 58.347 | 3.36 | 0.002 |
| dWASO | log-SD | Centered WASO × N2% variability (log-SD) | 0.546 | 0.115 | 4.75 | <0.001 |

**Note:** CV, coefficient of variation; SD, standard deviation; log-SD, standard deviation of log1p-transformed values; TST, total sleep time; SE, sleep efficiency; WASO, wake after sleep onset; SSTI, sleep stage transition index. SD-based TST variability is expressed in minutes. SD-based N2% variability is expressed in percentage points because N2 percentage was calculated on a 0–100 scale. SD-based SSTI variability is expressed in the original SSTI scale. N2% variability metrics were grand-mean centered before entering the dWASO interaction models. Significance was evaluated using Satterthwaite approximation.
